# Supplementary material for: Temporal and Spatial Distribution Patterns of Spodoptera frugiperda in Mountain Maize Fields in China
Source: MDPI journal article supplement (doi:10.3390/insects13100938), 2022-10-16
Supplement: s1 [file s1]

Supplementary file

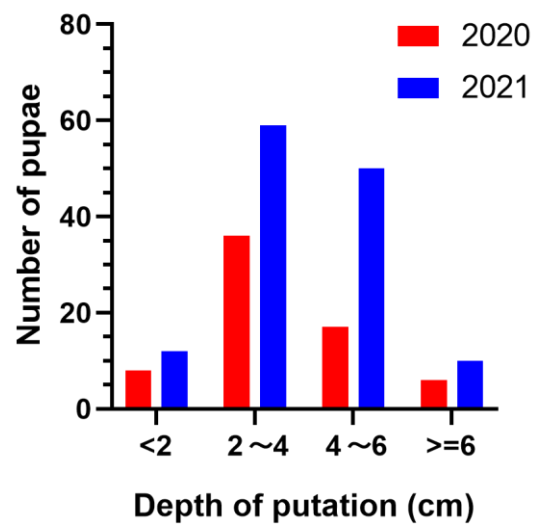

Figure S1. Depth of pupation of *S. frugiperda* in mountain maize fields in 2020 and 2021

Table S1. The egg laying position and egg mass situation *S. frugiperda* on maize plants at jointing stage in 2021

| Egg mass location             |                | Proportion (%) |
|-------------------------------|----------------|----------------|
| Adaxial or abaxial leaves     | Adaxial leaves | 5.23           |
|                               | Abaxial leaves | 94.77          |
| Distance from the midrib (cm) | 0- 0.5         | 75.73          |
|                               | 0.5-1.0        | 18.83          |
|                               | 1.0-1.5        | 3.97           |
|                               | ≥1.5           | 1.46           |
| Distance from main stem (cm)  | 0-10           | 46.96          |
|                               | 10-20          | 40.46          |
|                               | 20-30          | 8.18           |
|                               | ≥30            | 4.40           |
| Egg grain number /mass        | 0-50           | 27.82          |
|                               | 50-100         | 42.68          |
|                               | 100-150        | 19.87          |
|                               | ≥150           | 9.62           |
| Egg duration time (day)       | 1              | 25.94          |
|                               | 2              | 57.55          |
|                               | 3              | 16.51          |
| With or without villus        | Yes            | 48.95          |
|                               | No             | 51.05          |
| Parasitized or not            | Yes            | 11.30          |
|                               | No             | 88.70          |

Table S2. The investigation on damage part of the larvae of *S. frugiperda* on maize in mountain fields

| Growth stage (Date)             | Hazardous part               |
|---------------------------------|------------------------------|
| Seedling stage (6/15)           | Heart and young leaves       |
| Jointing stage (6/22)           | Heart and young leaves       |
| Trumpet stage (6/29~7/6)        | Heart leaves                 |
| Flare opening stage (7/13~7/20) | Heart leaves                 |
| Tasseling stage (7/27)          | Young leaves and tassel      |
| Powdering stage (8/3)           | Young leaves, tassel and ear |
| Spinning stage (8/10)           | Ear                          |
| Pustulation stage (8/17~8/31)   | Ear                          |
| Milk-ripe stage (9/7)           | Ear                          |
| Wax-ripe stage (9/14)           | Ear                          |

Table S3. Distribution of larvae *S. frugiperda* on maize plants in 2021

| Age                                     | Relative distribution proportion (%) |             |             |             | Difference significance analysis |
|-----------------------------------------|--------------------------------------|-------------|-------------|-------------|----------------------------------|
|                                         | Heart leaf                           | Stem (leaf) | Tassel      | Ear         |                                  |
| 1 <sup>st</sup> instar                  | 41.59±4.04                           | 25.26±12.58 | 0           | 33.15±13.79 | $F_{3,8}=3.53, P=0.07$           |
| 2 <sup>nd</sup> instar                  | 48.75±1.16a                          | 21.85±1.30c | 0.53±0.53d  | 28.87±0.30b | $F_{3,8}=466.03, P<0.05$         |
| 3 <sup>rd</sup> instar                  | 39.18±0.47a                          | 20.53±2.64c | 8.98±2.79c  | 31.32±0.77b | $F_{3,8}=44.38, P<0.05$          |
| 4 <sup>th</sup> instar                  | 34.31±3.07a                          | 15.30±0.81b | 12.35±0.90b | 38.04±3.10a | $F_{3,8}=33.17, P<0.05$          |
| 5 <sup>th</sup> instar                  | 33.9±3.12a                           | 15.84±0.30b | 13.83±2.34b | 36.44±2.03a | $F_{3,8}=28.84, P<0.05$          |
| 6 <sup>th</sup> instar                  | 24.51±2.74b                          | 15.07±2.58b | 18.62±4.17b | 41.79±3.80a | $F_{3,8}=12.25, P<0.05$          |
| 1 <sup>st</sup> -6 <sup>th</sup> instar | 37.73±1.37a                          | 18.64±1.12b | 9.13±1.08c  | 34.49±0.90a | $F_{3,8}=169.39, P<0.05$         |

Note: Values are mean ± SE. Data was analyzed by one way ANOVA with Tukey's HSD method at  $P<0.05$ . Different lowercase letters in the same line indicate significant differences.

Table S4. Density and aggregation index of early-instar larvae of *S. frugiperda* in maize field in 2020

| Growth stage        | Mean density plant <sup>-1</sup> | Variance (S <sup>2</sup> ) | Mean crowding Degree (m*) | Spread index (I) | Patchiness index (m*/m) | Ca index | Spread coefficient (C) | K value | Distribution type    |
|---------------------|----------------------------------|----------------------------|---------------------------|------------------|-------------------------|----------|------------------------|---------|----------------------|
| Seedling stage      | 0.20                             | 1.06                       | 4.50                      | 4.30             | 22.50                   | 21.50    | 5.30                   | 0.05    | Aggregation          |
| Jointing stage      | 0.95                             | 2.43                       | 2.51                      | 1.56             | 2.64                    | 1.64     | 2.56                   | 0.61    | Aggregation          |
| Trumpet stage       | 0.23                             | 0.36                       | 0.78                      | 0.55             | 3.40                    | 2.40     | 1.55                   | 0.42    | Aggregation          |
| Flare opening stage | 0.13                             | 0.28                       | 1.31                      | 1.18             | 10.06                   | 9.06     | 2.18                   | 0.11    | Aggregation          |
| Tasseling stage     | 0.01                             | 0.01                       | 0.00                      | -0.01            | 0.00                    | -1.00    | 0.99                   | -1.00   | Uniform distribution |
| Powdering stage     | 0.02                             | 0.02                       | 0.00                      | -0.02            | 0.00                    | -1.00    | 0.98                   | -1.00   | Uniform distribution |
| Spinning stage      | 1.18                             | 2.15                       | 2.00                      | 0.82             | 1.69                    | 0.69     | 1.82                   | 1.44    | Aggregation          |
| Pustulation stage   | 0.01                             | 0.01                       | 0.00                      | -0.01            | 0.00                    | -1.00    | 0.99                   | -1.00   | Uniform distribution |

$m^* = 0.88 + 1.49m$  (R = 0.44),  $\alpha = 0.88 > 0$ ,  $\beta = 1.49 > 1$ ;  
 $lgS^2 = 1.19lgm + 0.45$  (R = 0.98),  $lga = 0.45 > 0$ ,  $b = 1.19 > 1$

Table S5. Density and aggregation index of early-instar larvae of *S. frugiperda* in maize fields in 2021

[illegible]

Table S6. Density and aggregation index of late-instar larvae of *S. frugiperda* in maize field in 2020

[illegible]

Table S7. Density and aggregation index of late-instar larvae of *S. frugiperda* in maize fields in 2021[illegible]
